Nodal and Hedgehog Synergize in Gill Slit Formation during Development of the  
Cephalochordate *Branchiostoma floridae*

Ono, H.<sup>1,3</sup>, Koop, D.<sup>2</sup> and Holland, L.Z.<sup>1,4</sup>

<sup>1</sup>Marine Biology Research Division, Scripps Institution of Oceanography, University of  
California San Diego, 9500 Gilman Drive, La Jolla, CA 92093-0202

<sup>2</sup>Discipline of Anatomy and Histology, University of Sydney, Sydney, NSW 2006 Australia

<sup>3</sup>Present address: Oki Marine Biological Station, Kamo 194, Okinoshima-cho, Oki, Shimane,  
Japan, 685-0024

<sup>4</sup> correspondence to lzholland@ucsd.edu

Key words: pharyngeal patterning, gill slit development, nodal signaling, hedgehog signaling

**Summary statement:** In cephalochordates (amphioxus), the late gastrula/early neurula is critical for specification of future gill slits; Nodal signaling establishes their left-right position while Hh, downstream of Nodal, regulates *Gli* to mediate their penetration.

## Abstract

The larval pharynx of the cephalochordate *Branchiostoma* (amphioxus) is asymmetrical. The mouth is on the left and endostyle and gill slits are on the right. At the neurula, *Nodal* and *Hedgehog* (*Hh*) expression becomes restricted to the left. To dissect their respective roles in gill slit formation, we inhibited each pathway separately for 20 min at intervals during the neurula stage, before gill slits penetrate, and monitored effects on morphology and expression of pharyngeal markers. The results pinpoint the short interval spanning the gastrula/neurula transition as the critical period for specification and positioning of future gill slits. Thus, reduced *Nodal* signaling shifts the gill slits ventrally, skews the pharyngeal domains of *Hh*, *Pax1/9*, *Pax2/5/8*, *Six1/2*, *IrxC* towards the left and reduces *Hh* and *Tbx1/10* expression in endoderm and mesoderm, respectively. *Nodal* autoregulates. Decreased *Hh* signaling does not affect gill slit positions or *Hh* or *Nodal* expression but reduces the domain of the *Hh* target, *Gli* in the pharyngeal endoderm. Thus, during the neurula, *Nodal* and *Hh* cooperate in gill slit development—*Hh* mediates gill slit formation while *Nodal* establishes their left-right position.

## Introduction

In bilateral animals, some organs are often arrayed asymmetrically about the midline. For example, in vertebrates, the viscera are asymmetrical while in the invertebrate chordate amphioxus, the larval pharynx is highly asymmetrical with gill slits, the endostyle (homologous to the vertebrate thyroid gland) and a larval secretory organ, the club-shaped gland, forming on the right and the mouth developing on the left. In many organisms, the specification of left-right asymmetry is mediated by the secreted signaling protein *Nodal* on the left (Boorman and Shimeld, 2002). In amphioxus, *Nodal* is initially expressed symmetrically, but by the early neurula, expression becomes restricted to the left side (Yu et al., 2002; Yu et al., 2007). Inhibition of *Nodal* signaling during the neurula stage, when pharyngeal structures are being specified, causes a duplicate endostyle, normally on the right side, to develop on the left and inhibits formation of the first gill slit and mouth (Soukup et al., 2015). As in other organisms, *Nodal*, *Cerberus*, *Lefty* and *Pitx* cooperate (Li et al., 2017). However, *Nodal* is not the only signaling protein that is asymmetrically expressed during development. In both vertebrates and amphioxus, *Hedgehog* (*Hh*) genes also become asymmetrically expressed on the left side during early development (Shimeld, 1999; Dyer and Kirby, 2009; Tsiairis and McMahon, 2009; Tsikolia et al., 2012; Otto et al., 2014), while the *Hh* target *Gli* is expressed in the developing gill

slit primordia (characterized by a thickening of the endoderm where each gill slit will form) (Shimeld, 2007). In the mouse, knockout of one *Hh* gene, *Sonic hedgehog* (*Shh*) results in the first pharyngeal arches being fused in the midline (Moore-Scott and Manley, 2005; Yamagishi et al., 2006; Swartz et al., 2012) as well as in failure of the neural tube to fuse (holoprosencephaly) (Xavier et al., 2016). Similarly, in amphioxus, knockout of *Hh* eliminates the mouth; the gill slit primordia are either absent or aberrant and ventralized (Wang et al., 2015; Hu et al., 2017). Thus, the effects of inhibiting either Nodal or Hh signaling on gill slit formation in amphioxus embryos are much the same, raising the question of whether Nodal and Hh act together or independently in patterning the amphioxus pharynx.

Signaling by both Nodal and Hh proteins is complex. In the canonical pathway, Nodal, which is in the TGF- $\beta$  family, binds to activin receptors 1 and 2, leading to phosphorylation of Smads 2/3, that then complex with Smad4. This Smad complex then translocates to the nucleus where it participates in activation of Nodal target genes. In canonical Hh signaling, Hh binds to the trans-membrane protein Patched, relieving repression by a second trans-membrane protein Smoothed, thereby converting *Gli* from a repressor to an activator of target sequences (Jenkins, 2009). In addition, non-canonical signaling by Hedgehog and by TGF- $\beta$  proteins, as well as context-dependency has been described (Bertrand and Dahmane, 2006; Jenkins, 2009; Massague, 2012; Wang et al., 2016; Szczepny et al., 2017).

The focus on possible interactions of Nodal and Hedgehog signaling in vertebrates has been on the CNS and the lateral plate mesoderm. In some contexts, Nodal and Hedgehog appear to act in parallel, while in others one may regulate the other. For example, Nodal and *Shh* signaling are both involved in development of the vertebrate neural tube (Luo, 2017). Separate or simultaneous inhibition of the two genes causes holoprosencephaly indicating that the two proteins probably act synergistically (Monuki, 2007; Mercier et al., 2013). Moreover, they may be co-regulated; for example, knockdown of the transcription factor *Zic1* reduces signaling by both Nodal and Hh (Maurus and Harris, 2009). Specification of ventral domains in the vertebrate CNS also requires signaling by both Nodal and Hh; in this instance Nodal is upstream of Hh. In addition, non-canonical Nodal signaling in the prechordal mesoderm acts to maintain expression of *Shh* (Ellis et al., 2015), while canonical Hh signaling in the lateral plate mesoderm is indirectly responsible for initiation and propagation of Nodal signaling (Tsiairis and McMahon, 2009). Consequently, mutations in either *Hh* or *Nodal* can also result in laterality defects

(Roessler and Muenke, 2001). In animals other than vertebrates, *Hh* may also regulate *Nodal*. For example, in sea urchins, *Hh* regulates the late asymmetric expression of *Nodal* (Warner et al., 2016). This is reminiscent of the late role of *Hh* in activating *Nodal* signaling in the lateral plate mesoderm of vertebrates (Tsiairis and McMahon, 2009).

It is unclear whether *Hh* and *Nodal* interact in pharyngeal patterning. In vertebrates, *Hh* is expressed in the pharyngeal endoderm where it is involved in patterning the pharyngeal arches; it is upstream of and positively regulates *Tbx1* (Garg et al., 2001), but negatively regulates *Fgf8* (Haworth et al., 2007; Billmyre and Klingensmith, 2015), *Bmp4* and *Pax1* (Moore-Scott and Manley, 2005). *Nodal* signaling, upstream of *Pax2*, *Nkx2.1* and *Hex* is essential for development of the thyroid gland, a derivative of the pharyngeal endoderm (Elsalini et al., 2003; Porazzi et al., 2009). This raises the question whether *Nodal* and *Hh* act independently to pattern the pharynx or whether they interact and if so, to what extent.

To investigate possible relationships between *Nodal* and *Hh* in pharyngeal patterning, we used amphioxus as a simple chordate model. Amphioxus has little genetic redundancy, making it highly suitable for understanding the role of specific genes in embryonic patterning. A recent study reported that expression of the *Nodal* antagonist *Cerberus* is absent in null mutants of amphioxus *Hh* and, therefore, concluded that *Hh* signaling regulates *Nodal* indirectly (Hu et al., 2017). However, this interpretation is equivocal as overexpression of *Hh* had no effect on either *Cerberus* expression or on left/right asymmetry of amphioxus embryos (Hu et al., 2017). To determine whether *Nodal* and *Hh* act together or independently in pharyngeal patterning in amphioxus, we, therefore, inhibited each pathway separately for a limited time span at intervals from the late gastrula through the neurula stage and determined the effect on pharyngeal morphology and expression of a variety of genes expressed in the pharyngeal endoderm and/or developing gill slits. Our results reveal a narrow window at the late gastrula/early neurula where *Nodal* signaling establishes the left-right position of gill slits, while *Hh* functions to mediate in gill slit formation. Although *Nodal* autoregulates and to some extent may also regulate *Hh*, the two pathways act largely in parallel in gill-slit patterning and formation in amphioxus.

## Results

In normal embryos of the Florida amphioxus (*Branchiostoma floridae*), the larval gill slits form in the center of the gill slit primordia (thickened regions of the endoderm overlain by a thin layer of ectoderm). About 30-34 hrs of development at 25° C, the ectoderm and endoderm fuse to form the first gill slit on the right side. Within the next two days two more gill slits are added posterior to the first (Fig. 1). Genes associated with gill slit formation begin to be expressed from the early neurula (about 10 hpf), well before there is any morphological indication of a gill slit or even a gill slit primordium. For example, *Pax1/9* initially is broadly expressed in the pharyngeal endoderm at the early neurula, about 9 hpf and becomes downregulated about 10-11 hpf in the primordium of the first gill slit (Holland et al., 1995). Therefore, to determine the roles of Nodal and Hh signaling in gill slit positioning and penetration, we focused our experiments on the late gastrula through neurula stages.

To inhibit Nodal and Hh signaling, we used the chemical inhibitors SB505124 (2-(5-benzo[1,3]dioxol-5-yl-2-tert-butyl-3H-imidazol-4-yl)-6-methylpyridine hydrochloride), that inhibits the Alk4, Alk5 and Alk7 Activin/Nodal receptors, and cyclopamine, that specifically binds to Smoothened and prevents transduction of the Hh signal (Chen et al., 2002a). When embryos are continuously exposed from the early gastrula to either 15  $\mu$ M SB505124 or 1.5  $\mu$ M cyclopamine, the resulting larvae are severely deformed and essentially lack a pharynx; gill slits and gill slit primordia are absent, although there may be some small domains of expression of pharyngeal markers at the anteriormost region of the larva (Fig. S1). To confirm that cyclopamine blocks Hh signaling, we treated embryos at the early gastrula with 1.75  $\mu$ M cyclopamine and fixed aliquots at the late gastrula/very early neurula and at the early to mid-neurula. In situ hybridization for *Ptch*, a target of Hh signaling in amphioxus (Hu et al., 2017) as in other organisms (Chen et al., 2002a, 2002b), showed that cyclopamine inhibits *Ptch* and, thus, blocks Hh signaling in amphioxus (Suppl. Fig. 3). At high concentrations of cyclopamine, long exposures lead to the ectoderm dissociating into individual cells. Therefore, to determine the optimum conditions for affecting pharyngeal patterning without completely eliminating the gill slit primordia or killing the larvae, we first did pilot experiments adding each inhibitor at the following concentrations: 1.5  $\mu$ M, 1.75  $\mu$ M, 2.0  $\mu$ M and 4.0  $\mu$ M cyclopamine for 20 min at half-hour intervals (the newly-hatched late gastrula, the early neurula, the early-mid neurula and the mid-neurula; see Fig. 2) and 1.0  $\mu$ M, 10  $\mu$ M, and 50  $\mu$ M SB505124 for 20 min added at the same

times plus mid/late neurula and the late neurula (Table S1). The optimal concentrations of inhibitors for additional experiments were determined as those resulting in a lateral shift in the position of the gill slit primordia and/or the failure of the gill slits to open (Table S1). The results of these experiments showed that 10  $\mu$ M SB505124 added at the late gastrula or early neurula had a very mild effect with slightly smaller gill slits, while 50  $\mu$ M had a severe effect with most embryos either lacking gill slits or dying. We, therefore, chose 15  $\mu$ M SB505124 for subsequent experiments. Cyclopamine also eliminated gill slits at the highest concentration we used (4  $\mu$ M). Therefore, for subsequent experiments, we used 1.5 or 1.75  $\mu$ M, which gave smaller gill slits.

As is typical when either inhibitors or activators of signaling pathways are added to amphioxus embryos in DMSO or ETOH, at a given concentration, there is a range of severe to mild phenotypes evidently due to slightly uneven mixing. Figure 1 shows the range of phenotypes resulting from treatment with 15  $\mu$ M SB505124 or 1.75  $\mu$ M cyclopamine for 20 min at the late gastrula stage. The effects on gill slit size of adding these inhibitors at three stages (late gastrula, early neurula and early-mid neurula) are graphed in Figure 2. In controls, at 46 hrs hpf, the first two gill slits have opened on the right (Fig. 1, top). In the slightly milder phenotype resulting from addition of 15  $\mu$ M SB505124 at the late gastrula stage, the gill slit primordia are present, but smaller than normal and shifted somewhat ventrally; in the most severe phenotype, gill slits are impenetrant and the gill slit primordia are small (Fig. 1B). With 1.75  $\mu$ M cyclopamine added at the late gastrula stage, the first two gill slit primordia appear to be on the right, but are much smaller than normal; the first gill slit has opened (Fig. 1B). In the more severe phenotype, neither the gill slits nor the gill slit primordia are detectable (Fig. 1). Figure 2 shows that for 15  $\mu$ M SB505124, small differences in the time of treatment had major effects on the size of gill slits with most gill slits failing to penetrate with the earliest treatment, and most being about half normal size at the latest treatment (Fig. 2A). In contrast, most of the larvae treated with 1.75  $\mu$ M cyclopamine had very small gill slits regardless of the time of treatment (Figs. 1, 2B). Thus, the effect of altered Nodal signaling on gill slit size is restricted to narrow time window, whereas Hh regulates gill slit size through at least the mid-neurula.

#### *Pharyngeal gene expression in embryos and larvae treated with SB505124 and cyclopamine*

To determine the respective roles of Nodal and Hh in regulating expression of pharyngeal markers during gill slit formation in amphioxus, we performed in situ hybridization for seven genes expressed in the developing pharynx (*Nodal*, *Hedgehog*, *Gli*, *Pax1/9*, *Pax2/5/8*, *IrxC*,

*Tbx1/10*). Since a high percentage of larvae treated with 15  $\mu$ M SB505124 at the early-mid neurula stage had nearly normal gill slits, while the effects of adding 1.75  $\mu$ M cyclopamine for 20 min at the early neurula and early-mid neurula stages were the same (Fig. 1), we restricted these experiments to treatments at the late gastrula (9 hpf) and early neurula (10 hpf) stages. Figure 3 shows that addition of 15  $\mu$ M SB505124 for 20 min at either the late gastrula or early neurula stage severely reduces *Nodal* expression (Fig. 3A-L; A'-L'). In addition, when SB505124 is applied at the late gastrula stage, down-regulation of *Nodal* in the dorsal-lateral endoderm on the right, which normally occurs at the early/mid-neurula stage, is retarded (compare Fig. 3D and J). In line with a lesser effect on morphology if *Nodal* inhibition is delayed until the early neurula stage, the reduction in *Nodal* expression is not as pronounced in embryos treated at the early neurula stage compared to those treated at the late gastrula stage (Fig. 3 A'-L'). In contrast, cyclopamine, when added at either the late gastrula stage (Fig. 3M-X) or the early neurula stage (Fig. 3 M'-X') has little effect on *Nodal* expression except that when applied at late gastrula stage the ectodermal domain on the left side is somewhat reduced or eliminated (arrows Fig. 3 P,R and 3 V,X). These results show that, while *Nodal* likely autoregulates itself, *Hh* does not regulate *Nodal*, except perhaps to slight extent in the ectoderm.

To ask whether *Hh* expression is also autoregulated or regulated by *Nodal* signaling (Fig. 4), we assayed for *Hh* expression in embryos treated with either SB505124 or cyclopamine at the late gastrula and early neurula stages (Fig. 4). The major effects of SB505124 on *Hh* expression are a reduction of the domain in the ventral endoderm and a shift of the endodermal domain to the left. This is in line with the first gill slit primordium being shifted ventrally (compare Fig. 4 G, H, and J, K to Fig. 4 R, S and U, V) and suggests that *Nodal* may regulate the ventral endodermal domain of *Hh*. In addition, in embryos treated with SB505124 at the late gastrula stage, down-regulation of *Hh* on the right side (arrows, Fig. 4O) compared to control (Fig. 4D) was retarded, while up-regulation of *Hh* ventrally and on the left side was reduced (compare Fig. 4G, J and R, U). *Hh* expression was not reduced on the left when *Nodal* inhibition was delayed until the early neurula (Fig. 4 A'-V''). Inhibition of *Hh* signaling at either the late gastrula or early neurula had little effect on *Hh* expression (Fig. 4 W-R', W''-R'''). Therefore, it is unlikely that there is a feedback loop whereby *Hh* regulates itself.



*Gli* is a zinc finger transcription factor that transduces the Hh signal. In early amphioxus embryos, the two genes are expressed in largely complementary patterns, with *Hh* expressed in the notochord and dorsal-lateral endoderm and *Gli* in the developing somites and anterior neural plate (Figs. 4A,B, 5A, B). At the mid-neurula stage both genes also become expressed in the ventral endoderm, although the domain of *Hh* is skewed to the left, while that of *Gli* is more medial (Figs. 4,D,G; 5D,F,T,U). Inhibition of Nodal signaling for 20 min at the late gastrula stage has little effect on *Gli* expression except that by the early larval stage the ventral endodermal domain in the second gill slit is greatly reduced in severely affected larvae with impenetrant gill slits, (Fig. 5O) while *Gli* expression persists in the gill slit primordia of control embryos (Fig. 5G, H). Inhibition of Nodal signaling for 20 min at the early neurula has no clear effect on *Gli* expression (Fig. 5A''-P''). In contrast, when Hh signaling is inhibited at the late gastrula stage, the ventral endodermal domain of *Gli* is reduced at the mid and late neurula stages (Fig. 5S-V, A'-E'). Whether this is due to slightly retarded development or to inhibition of *Gli* per se is not clear, as in normal embryos, the ventral domain of *Gli* only appears between the early and mid-neurula stages (compare Fig. 5 Q, R and Fig. 5S, T). There is no apparent effect on *Gli* expression when addition of cyclopamine is delayed to the early neurula stage (Fig. 5Q''-F'''). These results indicate that while Nodal signaling has little if any effect on *Gli* expression, that at the late gastrula stage, Hedgehog signaling regulates the ventral endodermal domain of *Gli*.

In addition to determining the effects of Nodal and Hh inhibition on these genes themselves as well as on the direct Hh target, *Gli*, we examined the effects of their inhibition on five other genes expressed in the amphioxus pharynx at the neurula and early larval stages. These include *Pax1/9*, normally expressed throughout the pharyngeal endoderm at the early neurula and subsequently down-regulated in the gill slit primordia; *Pax2/5/8*, expressed where the gill slits will penetrate; *Six1/2*, expressed in the ventral and lateral endoderm; *IrxC*, co-expressed in the pharyngeal endoderm with *Six1/2*; and *Tbx1/10*, expressed in the endoderm and mesoderm of the developing branchial bars. The effect of Nodal inhibition on the domain of *Pax1/9* is in proportion to the effect on the size and position of the gill slit primordia (Fig. 6A-P, A''-P''). Just as Nodal inhibition shifts the gill slits ventrally, it shifts the endodermal domain of *Pax1/9* to the left so that the region where *Pax1/9* is down-regulated continues to coincide with the region where the gill slit primordia will develop. The degree of shifting to the left is similar whether



SB505124 is added at the late gastrula or early neurula stages. These results suggest that *Pax1/9* is downstream of Nodal and functions to maintain the undifferentiated state of the pharyngeal endoderm outside the gill slit primordia. In contrast, the primary effect of cyclopamine, since it does not change the position of the gill slits, is to delay development such that *Pax1/9* is downregulated in the endoderm somewhat later than in the controls (compare Fig. 6S, T and Fig. 6 A', B' and Fig. 6 S'', T'' and A''', B''').

*Pax2/5/8* is first expressed in the pharyngeal endoderm at the mid-neurula in a pattern complementary to that of *Pax1/9* (Figs. 6C, D, 7C,D). In embryos treated with SB505124 at either the late gastrula or early neurula stages, the pharyngeal domain of *Pax2/5/8* expression is reduced (Fig. 7 A-P, A''-P''), although the reduction is more pronounced when SB505124 is added at the earlier time. For example, when the inhibitor is added at the late gastrula stage, the domain of *Pax2/5/8* associated with the mouth (Fig. 7G, O, H, P) is reduced and those associated with the first two gill slits are eliminated (arrows in Fig. 7G, O, H, P). When the nodal inhibitor is added at the early neurula stage, there is only a slight reduction of the *Pax2/5/8* domain in the pharynx (Fig. 7A''-P'). The addition of cyclopamine at either time has no clear effect on the *Pax2/5/8* domain, except that as development is delayed, initial expression of *Pax2/5/8* in the pharynx is also delayed. These results indicate that expression of *Pax2/5/8* in the pharynx probably requires Nodal signaling, but that Hh may not regulate *Pax2/5/8*.

The endodermal domains of *Six1/2* and *IrxC* in normal neurulae largely overlap (compare Fig. 8A-P, Q''-F''' and Fig. 9A-P, Q''-F'''). By the early larva, however, the pharyngeal domains of both genes become restricted to the mouth and gill slit primordia (Fig. 8G,H, Fig. 9G, H). In fact, by the mid to late neurula, the pharyngeal domain of *IrxC* is congruent with the area where *Pax1/9* becomes downregulated around the gill slits, although that of *Six1/2* is somewhat broader than this region. The pharyngeal domains of both genes are shifted to the left when SB505124 is added at the late gastrula stage (Fig. 8A-P, Fig. 9A-P). However, there is no clear effect on expression of either gene when SB505124 is added at the early neurula (Fig. 8A''-P'', Fig. 9A''-P''). There is also no clear effect of cyclopamine when added at the late gastrula or early neurula (Fig. 8Q-F', Q''-F''', Fig. 9Q-F', Q''-F'''). Thus, both *Six1/2* and *IrxC* appear to be downstream of Nodal signaling but are not downstream of Hh.

The final gene we examined was *Tbx1/10*, normally expressed in the ventral endoderm and lateral mesoderm on the left side that will give rise to the mesoderm of the branchial bars. The only effect of Nodal inhibition at the late gastrula stage is the disappearance of the domain of *Tbx1/10* in the lateral mesoderm (Fig. 10D-L, P-X). There is no effect on *Tbx1/10* expression when SB505124 addition is delayed until the early neurula stage (Fig. 10A''-X'') and no clear effect of cyclopamine added at either the late gastrula or early neurula on *Tbx1/10* expression (Fig. 10Y-V', Y''-V''').

Taken together, these results show that the precise left-right position of the gill slits is largely mediated by levels of Nodal signaling at the late gastrula/early neurula stages with higher levels of Nodal shifting gill slits to the right and lower levels shifting them to the left. A Nodal feedback loop reinforces Nodal signaling. The expression domains of genes that are either downregulated in the future gill slit primordia (*Pax1/9*) or expressed in the gill slit primordia (*Six1/2*, *IrxC*, *Pax2/5/8* and at the larval stage *Gli*) are shifted to the left as Nodal signaling is reduced. Surprisingly, a reduction in Nodal signaling at the late gastrula stage strongly reduces *Tbx1/10* expression in the branchial arches. Thus, all of these genes are downstream of Nodal signaling (Fig. 11). In addition, Nodal signaling is required for gill slit penetration and may act by positively regulating *Pax2/5/8* where the ectoderm and endoderm will fuse to form gill slits and/or by regulating *Hh*, which is also required for gill slit penetration.

In contrast, although inhibition of Hh signaling at either the late gastrula or early neurula strongly inhibits gill slit formation, the effects on expression of pharyngeal markers (for example *Pax1/9*) were very mild and could be due to a general developmental delay. The ventral endodermal domain of *Gli* is somewhat reduced. However, even in the severest phenotype with impenetrant gill slits generated by cyclopamine treatment, reducing Hh signaling has no effect on the position of the gill slits. Even when gill slits completely fail to penetrate, the expression of pharyngeal markers in the gill slit primordia is essentially unchanged (Fig. S2, Fig. 10). Thus, at the late gastrula and early neurula stages Hh appears to play little, if any, role in establishing the position of the gill slits and gill slit primordia, but does affect gill slit penetration.

## Discussion

### *Stage-specific signaling during embryogenesis*

The above results on the roles of Nodal and Hh signaling in early embryonic patterning of the amphioxus pharynx emphasize the rapidly changing roles of signaling pathways in early development. For example, during cleavage stages through the mid- gastrula of amphioxus, *Nodal* is expressed dorsally and acts in opposition to BMPs to specify neuroectoderm and dorsal-anterior identity (Onai et al., 2010). Thus, inhibition of Nodal with SB505124 from cleavage stages onward results in loss of dorsal and anterior identity (Onai et al., 2010). Not surprisingly, Nodal has been identified as a neural inducer in amphioxus (Le Petillon et al., 2017). However, as diagrammed in Fig. 11, at the late gastrula/early neurula stage, the role of Nodal changes; *Nodal* expression is down-regulated on the right. From then into the neurula stage, Nodal signaling regulates left/right asymmetry (Soukup et al., 2015; Li et al., 2017). Correspondingly, overexpression in very early embryos of the Nodal inhibitor *Cerberus*, normally expressed on the right, causes loss of dorsal and anterior structures (Onai et al., 2010), while a mutation of *Cerberus* results in a milder phenotype with the right side of amphioxus embryos adopting a left-side identity and the gill slits shifted ventrally (Li et al., 2017). Null mutants of *Hh*, similar to embryos in which Nodal is inhibited during the neurula stage, have ventralized gill slits and lack *Cerberus* expression, suggesting that *Hh* may indirectly regulate *Nodal* via *Cerberus* (Hu et al., 2017). However, our experiments, carried out at the late gastrula through the neurula stage after *Cerberus* ceases to be expressed on the right indicate that if Nodal does regulate left/right asymmetry in part through Hh, it must do so very early in development. By the early neurula stage, when inhibiting Nodal affects left/right asymmetry (Soukup et al., 2015), inhibiting Hh signaling for 20 min has little or no effect on either *Nodal* expression or on the left-right position of the gill slits (Fig. 3). Instead, it is quite the opposite--inhibiting Nodal signaling for 20 min at the late gastrula/very early neurula inhibits expression of *Hh* in the pharyngeal endoderm (Fig. 4).

Not only does Nodal signaling at the late gastrula/early neurula stage control the lateral *position* of the gill slits, it also regulates the *size* of the gill slits. In severe phenotypes caused by inhibition of Nodal signaling, gill slits do not penetrate; gill slit primordia can be fused or be completely absent. These effects could be mediated by reduced *Hh* expression in the pharyngeal endoderm and/or to reduced *Tbx1/10* expression in the pharyngeal mesoderm. Reduced Nodal

signaling at the late gastrula stage reduces the endodermal domain of *Hh* and shifts it to the left (Fig. 4), while a reduction in *Hh* signaling can completely eliminate the gill slit primordia (Fig. 2D). Inhibition of Nodal signaling at the late gastrula stage also eliminates mesodermal expression of *Tbx1/10* (Fig. 10F,R,I,U) while knockdown of *Tbx1/10* eliminates the gill slits and branchial bars (Koop et al., 2014).

Surprisingly, the *Hh* null mutants, like the milder phenotype of cyclopamine-treated larvae, were reported to have developed gill slits (Hu et al., 2017). While we would have expected the null mutants to lack gill slits like the more severe phenotype resulting from cyclopamine treatment at the late gastrula/very early neurula (Suppl. Fig. 2), it could be that the most severely affected *Hh* mutants failed to develop to the larval stage. Alternatively, although cyclopamine has been shown to be a very specific inhibitor of Hh signaling (Chen et al., 2002a; Chen et al., 2002b), off-target effects cannot be completely ruled out (Meyers-Needham et al., 2012).

In addition to Nodal and Hh, other signaling pathways also function in early embryonic patterning. For example, during the gastrula stage when Nodal and BMP act in opposition to establish dorso-ventral identity in amphioxus embryos, retinoic acid signaling establishes position along anterior/posterior axis (Koop et al., 2010), while Wnt-signaling concomitantly specifies the posterior end of the amphioxus embryo. Retinoic acid signaling also has a late role in pharyngeal patterning; for gill slits to penetrate, it is kept low in the gill slit primordia by the RA antagonist *Tr2/4* (Escriva et al., 2002; Koop et al., 2014). *Fgfs* and *Wnts* are also expressed in the developing amphioxus pharynx, but their roles in pharyngeal patterning have not yet been reported (Bertrand et al., 2011,2015; Schubert et al., 2000, 2001).

#### *Nodal and Hedgehog function in pharyngeal patterning in vertebrates*

Nodal and Hh genes are both involved in patterning vertebrate embryos, but whether they interact in pharyngeal patterning is not clear. In vertebrates, Nodal signaling is required for endoderm specification as well as development of the thyroid, a derivative of the pharyngeal endoderm (Elsalini et al., 2003; Grapin-Botton and Constam, 2007; Porazzi et al., 2009). Similar to amphioxus where expression of *Hh* in the pharynx is highest just anterior to the first gill slit primordium (Fig. 4), in vertebrates, *Shh* is strongly expressed in the endoderm and ectoderm of the first pharyngeal arch, where it is essential for development of mandibular arch derivatives (Brito et al., 2006, 2008; Haworth et al., 2007; Gillis et al., 2009; Swartz et al., 2012; Billmyre and Klingensmith, 2015; Dworkin et al., 2016). *Shh* signaling is low in the posterior

pharyngeal pouches, allowing the parathyroid marker *Gcm2* to be expressed (Grevellec et al., 2011).

Shh interacts with a variety of genes in pharyngeal patterning (Yamagishi et al., 2006; Billmyre and Klingensmith, 2015; Xavier et al., 2016). For example, ectopic expression of *Shh* in endoderm of the pharyngeal pouches of the mouse induces expression of *Tbx1* (Yamagishi et al., 2003; Bain et al., 2016). In *Shh*<sup>-/-</sup> mice, the pharynx is initially patterned correctly, but the first arch atrophies and the first pharyngeal pouch does not form. The second, third and fourth pharyngeal arches are small (Moore-Scott and Manley, 2005). Like nodal, Shh signaling is also required for normal development of the thyroid (Fagman et al., 2004; Moore-Scott and Manley, 2005; Bain et al., 2016; Figueiredo et al., 2016;). Nodal and Hh cooperate in patterning the mesoderm, but whether they act together or in parallel in thyroid development has not been addressed. In some models, initial Nodal asymmetry was proposed to be downstream of Shh. For example, in the chick, Shh inhibition in early development represses Nodal in lateral plate and paraxial mesoderm (Otto et al., 2014). In contrast, ProNodal, but not mature Nodal, acts indirectly to maintain Shh expression in the prechordal mesoderm (Ellis et al., 2015). However, it has also been suggested that other factors may regulate asymmetry of both genes in the paraxial mesoderm (Tsikolia et al., 2012).

Interactions of Nodal and Hh in development of the neural tube have been well documented in vertebrates. Mutations or chemical inhibition of either Nodal or Hh genes results in holoprosencephaly (Monuki, 2007; Mercier et al., 2013). In patterning the ventral neural tube, Nodal is upstream of Shh, which contains a Nodal-responsive enhancer (Muller et al., 2000; Ito et al., 2001; Rohr et al., 2001; Lupo et al., 2006). In addition, Nodal and Shh both function in development of the hypothalamus (Mathieu et al., 2002), while both Nodal and Hh signaling in the ventral diencephalon of the zebrafish are regulated by the transcription factor Zic1 (Maurus and Harris, 2009).

#### *Nodal and Hedgehog in other invertebrate deuterostomes*

In invertebrate deuterostomes other than amphioxus, Nodal and Hh sometimes interact. In sea urchin embryos, Nodal signaling establishes left/right asymmetry, while Hh signaling helps maintain Nodal expression once asymmetry is established (Materna et al., 2013; Warner et al., 2016). Whether Nodal and Hh interact in patterning developing hemichordates is unknown. In larvae of the indirectly developing hemichordate *Ptychodera flava*, Nodal inhibition disrupts

mesoderm formation and dorsoventral fates (Rottinger et al., 2015). Hh is expressed in the anterior region and pharyngeal endoderm of the larva of the same species (Arimoto and Tagawa, 2015). In another indirectly developing hemichordate, *Balanoglossus simodensis*, Hh is expressed in the dorsal endoderm and the stomochord (an anterior projection from the gut) (Miyamoto and Wada, 2013), while in the direct developer *Saccoglossus kowalevskii*, Hh is expressed in the anterior ectoderm and anterior gut (Lowe et al., 2006). Expression of these genes in the developing adult pharynx of hemichordates has not been reported.

The emerging picture is that a role for Nodal in patterning the left/right axis existed at the base of the Bilateria and has been preserved in both spiralian and chordates (Grande and Patel, 2009; Martín-Durán et al., 2016). Subsequently, in deuterostomes, additional functions for these genes in patterning the dorso/ventral and anterior/posterior axes arose. With multiple signaling pathways, including Hh and retinoic acid signaling working at the same time, and the same signaling pathways doing different things at different times, the developing picture of the genetic mechanisms that pattern the pharynx and establish the gill slits is increasingly complex. However, in the absence of whole genome duplications, amphioxus is optimally positioned for understanding the fundamentals of pharyngeal patterning in chordates. Comparisons between amphioxus and vertebrates have shown that the ancestral chordate had a pharynx with gill slits and an endostyle that was patterned by signaling pathways including Nodal, Hh, RA, Wnt. Importantly, the roles of these pathways in embryogenesis change with time. First, they act simultaneously to specify the anterior/posterior and dorsal/ventral axes, then during the gastrula stage they divide the embryo into regions along these axes and finally during the neurula stage, they specify discrete tissues and organs. An important way forward toward understanding how the amphioxus genome generates a phenotype would be to further dissect the gene networks downstream of these pathways.

## Materials and Methods

### *Embryos and pharmacological treatments*

Breeding cultures of the Florida amphioxus (*Branchiostoma floridae*) are maintained in the Holland laboratory. Larvae and adults are fed on brown phytoplankton (*Isochrysis*, *Pavlova* and *Tisochrysis*) originally obtained from NCMA at the Bigelow laboratory (East Boothbay, ME). Animals are raised at 25° C. Adults are kept on a 10 h dark, 14 hr light cycle. Ripe animals are then maintained at 17° C for at least two weeks. When returned to 25° C, 20-80% of the animals usually spawned 24-28 hrs later when the light was turned off. Nodal was inhibited with SB505124 (Medchem Express, Monmouth Junction, NJ). A stock solution of 50 mM was made in DMSO and used at final concentrations of 10-50µM. Hedgehog signaling was inhibited with cyclopamine (LC laboratories, Woburn, MA). A stock solution of 50 mM in 100% ethanol and added to embryos at concentrations of 1.5-4.0 µM. Embryos were treated for 20 min with each inhibitor at the late gastrula (9 hpf ) and early neurula (10 hpf). Controls were treated with DMSO or ETOH alone. To confirm that cyclopamine inhibits Hh signaling in amphioxus, we 1.75 µM cyclopamine at the very early gastrula stage and fixed for in situ hybridization at the late gastrula/early neurula, early to mid-neurula and early larval stage. The experiment was repeated three times. Aliquots of embryos were fixed with 4% paraformaldehyde, 0.1 M MOPS, 1 mM EGTA, 2 mM MgSO<sub>4</sub>, 0.5M NaCl and stored in 70% ETOH at -20°C as previously described (Holland et al., 1996). Pilot experiments to determine the optimal concentrations of SB505124 and cyclopamine and times of treatment were carried out in duplicate. Experiments for determining the effects of these inhibitors on gene expression were carried out in triplicate. For each replicate, control and experimental samples were done in parallel on embryos from the same egg batch.

### *In situ hybridization.*

Methods for in situ hybridization were as previously described (Yu and Holland, 2009) with the following modification: 50µM EDTA was added to the PBST solution. Antisense riboprobes of *AmphiNodal* (AY083838), *AmphiHedgehog* (Y13858), *AmphiPax1/9* (U20167), *AmphiIrxC* (EU754750), *AmphiGli* (CAB96572), *AmphiPax2/5/8* (AF053762), *AmphiTbx* (AF262562) and *AmphiSix1/2* (EF195742) were synthesized. Templates for riboprobe synthesis of *Amphinodal*, *AmphiIrxCi*, and *AmphiPtch* were amplified from EST clones (bfga04g04, CAXF10761, GA035K03 respectively) in the pDONR222 vector. Vector-specific primers contained sites for



T7 and Sp6 RNA polymerase (pDONR222-T7-reverse: 5'-TAATACGACTCACTATAGGGAGGGGATATCAGCTGGATG-3'; pDONR222-Sp6-forward: 5'-ATTTAGGTGACACTATAGAAGACGGCAGTCTTAAGCTC-3'). Controls and experimentals were hybridized in parallel with the same riboprobes at the same concentrations, and color development was for the same period of time. For each in situ hybridization, 10 embryos of each stage were used. After in situ hybridization, the embryos were photographed as whole mount, and were stained with Ponceau-S, embedded in Spurr's resin, and 3 µm sections made with a glass knife as previously described (Holland et al., 1996). For each sample, three embryos of each stage were sectioned.

### **Acknowledgements**

We thank Daniel Hartsook, Zaren Youngblood, Taylor Crabtree, Esmeralda Alcantar and Joel Lashomb for animal husbandry.

### **Competing Interests**

The authors declare no competing interests.

### **Funding**

This study was supported by National Science foundation grant IOS 1353688 to LZH.

## References

- Arimoto, A. and Tagawa, K.** (2015). *Hedgehog* expression during development and regeneration in the hemichordate, *Ptychodera flava*. *Zoolog. Sci.* **32**, 33-37.
- Bain, V.E., Gordon, J., O'Neil, J.D., Ramos, I., Richie, E.R. and Manley, N.R.** (2016). Tissue-specific roles for sonic hedgehog signaling in establishing thymus and parathyroid organ fate. *Development* **143**, 4027-4037.
- Bertrand, N. and Dahmane, N.** (2006). Sonic hedgehog signaling in forebrain development and its interactions with pathways that modify its effects. *Trends Cell Biol.* **16**, 597-605.
- Bertrand, S., Camasses, A., Somorjai, I., Belgacem, M.R., Chabrol, O., Escande, M.L., Pontarotti, P. and Escriva, H.** (2011). Amphioxus FGF signaling predicts the acquisition of vertebrate morphological traits. *Proc Natl Acad Sci U S A* **108**, 9160-9165.
- Bertrand, S., Aldea, D., Oulion, S., Subirana, L., de Lera, A.R., Somorjai, I. and Escriva, H.** (2015). Evolution of the role of RA and FGF signals in the control of somitogenesis in chordates. *PLoS ONE* **10**, e0136587.
- Billmyre, K.K. and Klingensmith, J.** (2015). Sonic hedgehog from pharyngeal arch 1 epithelium is necessary for early mandibular arch cell survival and later cartilage condensation differentiation. *Dev. Dynam.* **244**, 564-576.
- Boorman, C.J. and Shimeld, S.M.** (2002). The evolution of left-right asymmetry in chordates. *BioEssays* **24**, 1004-1011.
- Brito, J.M., Teillet, M.A. and Le Douarin, N.M.** (2006). An early role for sonic hedgehog from foregut endoderm in jaw development: ensuring neural crest cell survival. *Proc. Natl. Acad. Sci. USA* **103**, 11607-11612.
- Brito, J.M., Teillet, M.A. and Le Douarin, N.M.** (2008). Induction of mirror-image supernumerary jaws in chicken mandibular mesenchyme by Sonic Hedgehog-producing cells. *Development* **135**, 2311-2319.
- Chen, J.K., Taipale, J., Cooper, M.K. and Beachy, P.A.** (2002a). Inhibition of Hedgehog signaling by direct binding of cyclopamine to Smoothened. *Genes & Development* **16**, 2743-2748.
- Chen, J.K., Taipale, J., Young, K.E., Maiti, T. and Beachy, P.A.** (2002b). Small molecule modulation of Smoothened activity. *Proc Natl Acad Sci USA* **99**, 14071-14076.

- Dworkin, S., Boglev, Y., Owens, H. and Goldie, S.J.** (2016). The role of sonic hedgehog in raniofacial patterning, morphogenesis and cranial neural crest survival. *J. Dev. Biol.* **4**, 24.
- Dyer, L.A. and Kirby, M.L.** (2009). Sonic hedgehog maintains proliferation in secondary heart field progenitors and is required for normal arterial pole formation. *Dev. Biol.* **330**, 305-317.
- Ellis, P.S., Burbridge, S., Soubes, S., Ohyama, K., Ben-Haim, N., Chen, C., Dale, K., Shen, M.M., Constam, D. and Placzek, M.** (2015). ProNodal acts via FGFR3 to govern duration of *Shh* expression in the prechordal mesoderm. *Development* **142**, 3821-3832.
- Elsalini, O.A., Gartzen, J.v., Cramer, M. and Rohr, K.B.** (2003). Zebrafish *hhex*, *nk2.1a*, and *pax2.1* regulate thyroid growth and differentiation downstream of Nodal-dependent transcription factors. *Dev. Biol.* **263**, 67-80.
- Escriva, H., Holland, N.D., Gronemeyer, H., Laudet, V. and Holland, L.Z.** (2002). The retinoic acid signaling pathway regulates anterior/posterior patterning in the nerve cord and pharynx of amphioxus, a chordate lacking neural crest. *Development* **129**, 2905-2916.
- Fagman, H., Grände, M., Gritli-Linde, A. and Nilsson, M.** (2004). Genetic deletion of Sonic Hedgehog causes hemiagenesis and ectopic development of the thyroid in mouse. *Am. J. Pathol.* **164**, 1865-1872.
- Figueiredo, M., Silva, J.C., Santos, A.S., Proa, V., Alcobia, I., Zilhão, R., Cidadão, A. and Neves, H.** (2016). Notch and Hedgehog in the thymus/parathyroid common primordium: Crosstalk in organ formation. *Dev. Biol.* **418**, 268-282.
- Garg, V., Yamagishi, C., Hu, T., Kathiriyi, I.S., Yaagishi, H. and Srivastava, D.** (2001). *Tbx1*, a DiGeorge syndrome candidate gene, is regulated by sonic hedgehog during pharyngeal arch development. *Dev. Biol.* **235**, 62-73.
- Gillis, J.A., Dahn, R.D. and Shubin, N.H.** (2009). Shared developmental mechanisms pattern the vertebrate gill arch and paired fin skeletons. *Proc. Natl. Acad. Sci. USA* **106**, 5720-5724.
- Grande, C. and Patel, N.H.** (2009). Nodal signalling is involved in left-right asymmetry in snails. *Nature* **457**, 1007-1011.
- Grapin-Botton, A. and Constam, D.** (2007). Evolution of the mechanisms and molecular control of endoderm formation. *Mech. Dev.* **124**, 253-278.
- Grevellec, A., Graham, A. and Tucker, A.S.** (2011). Shh signalling restricts the expression of *Gcm2* and controls the position of the developing parathyroids. *Dev. Biol.* **353**, 194-205.

- Haworth, K.E., Wilson, J.M., Grevellec, A., Cobourne, M.T., Healy, C., Helms, J.A., Sharpe, P.T., Tucker, A.S.** (2007). Sonic hedgehog in the pharyngeal endoderm controls arch pattern via regulation of *Fgf8* in head ectoderm. *Dev. Biol.* **303**, 244-258.
- Holland, L.Z., Holland, P.W.H. and Holland, N.D.** (1996). Revealing homologies between body parts of distantly related animals by in situ hybridization to developmental genes: Amphioxus versus vertebrates, in: Palumbi, S., Ferraris, J.D. (Eds.), *Molecular Approaches to Zoology and Evolution*. John Wiley, New York, pp. 267-282; 473-483.
- Holland, N.D., Holland, L.Z. and Kozmik, Z.** (1995). An amphioxus Pax gene, *AmphiPax-1*, expressed in embryonic endoderm, but not in mesoderm: implications for evolution of class I paired box genes. *Mol. Mar. Biol. Biotechnol.* **35**, 206-214.
- Hu, G., Li, G., Wang, H. and Wang, Y.** (2017). *Hh* gene participates in the left-right asymmetry development of amphioxus by controlling *Cer* expression. *Development* on line ahead of print.
- Ito, Y., Kuhara, S. and Tashiro, K.** (2001). In synergy with Noggin and Follistatin, *Xenopus Nodal-Related* gene induces *Sonic Hedgehog* on notochord and floor plate. *Biochem. Biophys. Res. Commun.* **281**, 714-719.
- Jenkins, D.** (2009). Hedgehog signalling: Emerging evidence for non-canonical pathways. *Cell. Signal.* **21**, 1023-1034.
- Koop, D., Chen, J., Theodosiou, M., Carvalho, J.E., Alvarez, S., de Lera, A.R., Holland, L.Z. and Schubert, M.** (2014). Roles of retinoic acid and *Tbx1/10* in pharyngeal segmentation: amphioxus and the ancestral chordate condition. *Evodevo* **5**, 1-16.
- Koop, D., Holland, N.D., Sémon, M., Alvarez, S., de Lera, A.R., Laudet, V., Holland, L.Z., Schubert, M.** (2010). Retinoic acid signaling targets *Hox* genes during the amphioxus gastrula stage: Insights into early anterior-posterior patterning of the chordate body plan. *Dev. Biol.* **338**, 98-106.
- Le Petillon, Y., Luxard, G., Scerbo, P., Cibois, M., Leon, A., Subirana, L., Irimia, M., Kodjabachian, L., Escriva, H. and Bertrand, S.** (2017). Nodal-activin pathway is a conserved neural induction signal in chordates. *Nat. Ecol. Evol.* **1**, 1192-1200.
- Li, G., Liu, X., Xing, C., Zhang, H., Shimeld, S.M. and Wang, Y.** (2017). Cerberus–Nodal–Lefty–Pitx signaling cascade controls left–right asymmetry in amphioxus. *Proc. Natl. Acad. Sci. USA* **114**, 3684-3689.

- Lowe, C.J., Terasaki, M., Wu, M., Freeman, R.M., Jr., Runft, L., Kwan, K., Haigo, S., Aronowicz, J., Lander, E., Gruber, C., Smith, M., Kirschner, M. and Gerhart, J.** (2006). Dorsoventral patterning in hemichordates: Insights into early chordate evolution. *PLoS Biol.* **4**, e291.
- Luo, K.** (2017). Signaling cross talk between TGF-B/Smad and other signaling pathways. *Cold Spring Harb. Perspect. Biol.* 9s022137.
- Lupo, G., Harris, W.A., Lewis, K.E.** (2006). Mechanisms of ventral patterning in the vertebrate nervous system. *Nat. Rev. Neurosci.* **7**, 103-114.
- Martín-Durán, J.M., Vellutini, B.C. and Hejnol, A.** (2016). Embryonic chirality and the evolution of spiralian left–right asymmetries. *Phil. Trans. Roy. Soc. B: Biol. Sci.* **371**, 20150411.
- Massague, J.** (2012). TGF- $\beta$  signalling in context. *Nat Rev Mol Cell Biol* **13**, 616-630.
- Materna, S.C., Swartz, S.Z. and Smith, J.** (2013). Notch and Nodal control forkhead factor expression in the specification of multipotent progenitors in sea urchin. *Development* **140**, 1796-1806.
- Mathieu, J., Barth, A., Rosa, F.M., Wilson, S.W. and Peyri  ras, N.** (2002). Distinct and cooperative roles for Nodal and Hedgehog signals during hypothalamic development. *Development* **129**, 3055-3065.
- Maurus, D. and Harris, W.A.** (2009). *Zic*-associated holoprosencephaly: zebrafish *Zic1* controls midline formation and forebrain patterning by regulating nodal, Hedgehog and retinoic acid signaling. *Genes Dev.* **23**, 1461-1473.
- Mercier, S., David, V., Rati  , L., Gicquel, I., Odent, S. and Dup  , V.** (2013). NODAL and SHH dose-dependent double inhibition promotes an HPE-like phenotype in chick embryos. *Disease Models Mech.* **6**, 537-543.
- Meyers-Needham, M., Lewis, J.A., Gencer, S., Sentelle, R.D., Saddoughi, S.A., Clarke, C.J., Hannun, Y.A., Norell, H., da Palma, T.M., Nishimura, M., Kraveka, J.M., Khavandgar, Z., Murshed, M., Cevik, M.O and Ogretmen, B.** (2012). Off-target function of the sonic hedgehog inhibitor cyclopamine in mediating apoptosis via nitric oxide–dependent neutral sphingomyelinase 2/ceramide induction. *Mol. Cancer Therap.* **11**, 1092-1102.
- Miyamoto, N. and Wada, H.** (2013). Hemichordate neurulation and the origin of the neural tube. *Nat Commun.* **4**, 2713.

- Monuki, E.S.** (2007). The morphogen signaling network in forebrain development and holoprosencephaly. *J. Neuropathol. Exp. Neurol.* **66**, 566-575.
- Moore-Scott, B.A. and Manley, N.R.** (2005). Differential expression of *Sonic hedgehog* along the anterior-posterior axis regulates patterning of pharyngeal pouch endoderm and pharyngeal endoderm-derived organs. *Dev. Biol.* **278**, 323-335.
- Muller, F., Albert, S., Blader, P., Fischer, N., Hallonet, M. and Strahle, U.** (2000). Direct action of the nodal-related signal cyclops in induction of *sonic hedgehog* in the ventral midline of the CNS. *Development* **127**, 3889-3897.
- Onai, T., Yu, J.K., Blitz, I.L., Cho, K.W. and Holland, L.Z.** (2010). Opposing Nodal/Vg1 and BMP signals mediate axial patterning in embryos of the basal chordate amphioxus. *Dev. Biol.* **344**, 377-389.
- Otto, A., Pieper, T., Viebahn, C. and Tsikolia, N.** (2014). Early left-right asymmetries during axial morphogenesis in the chick embryo. *Genesis* **52**, 614-625.
- Porazzi, P., Calebiro, D., Benato, F., Tiso, N. and Persani, L.** (2009). Thyroid gland development and function in the zebrafish model. *Mol. Cell. Endocrinol.* **312**, 14-23.
- Roessler, E. and Muenke, M.** (2001). Midline and laterality defects: Left and right meet in the middle. *BioEssays* **23**, 888-900.
- Rohr, K.B., Barth, K.A., Varga, Z.M. and Wilson, S.W.** (2001). The Nodal pathway acts upstream of Hedgehog signaling to specify ventral telencephalic identity. *Neuron* **29**, 341-351.
- Rottinger, E., DuBuc, T.Q., Amiel, A.R. and Martindale, M.Q.** (2015). Nodal signaling is required for mesodermal and ventral but not for dorsal fates in the indirect developing hemichordate, *Ptychodera flava*. *Biol. Open* **4**, 830-842.
- Schubert, M., Holland, L.Z., and Holland, N.D.** (2000). Characterization of two amphioxus *Wnt* genes (*AmphiWnt4* and *AmphiWnt7b*) with early expression in the developing central nervous system. *Dev. Dynam.* **217**, 205-215.
- Schubert, M., Holland, L.Z., Stokes, M.D., Holland, N.D.,** 2001. Three amphioxus *Wnt* Genes (*AmphiWnt3*, *AmphiWnt5*, and *AmphiWnt6*) associated with the tail bud: the evolution of somitogenesis in chordates. *Dev. Biol.* **240**, 262-273.
- Shimeld, S.M.** (1999). The evolution of the hedgehog gene family in chordates: Insights from amphioxus hedgehog. *Dev. Genes Evol.* **209**, 40-47.

- Shimeld, S.M.** (2007). An amphioxus *Gli* gene reveals conservation of midline patterning and the evolution of hedgehog signalling diversity in chordates. *PLoS ONE* **9**, e864.
- Soukup, V., Yong, L.W., Lu, T.-M., Huang, S.-W., Kozmik, Z. and Yu, J.-K.** (2015). The Nodal signaling pathway controls left-right asymmetric development in amphioxus. *Evodevo* **6**, 1-23.
- Swartz, M.E., Nguyen, V., McCarthy, N.Q. and Eberhart, J.K.** (2012). Hh signaling regulates patterning and morphogenesis of the pharyngeal arch-derived skeleton. *Dev. Biol.* **369**, 65-75.
- Szczepny, A., Rogers, S., Jayasekara, W.S.N., Park, K., McCloy, R.A., Cochrane, C.R., Ganju, V., Cooper, W.A., Sage, J., Peacock, C.D., Cain, J.E., Burgess, A. and Watkins, D.N.** (2017). The role of canonical and non-canonical Hedgehog signaling in tumor progression in a mouse model of small cell lung cancer. *Oncogene*. **36**, 5544-5550.
- Tsiarlis, C.D. and McMahon, A.P.** (2009). An Hh-dependent pathway in lateral plate mesoderm enables the generation of left/right asymmetry. *Curr. Biol.* **19**, 1912-1917.
- Tsikolia, N., Schröder, S., Schwartz, P. and Viebahn, C.** (2012). Paraxial left-sided *nodal* expression and the start of left–right patterning in the early chick embryo. *Differentiation* **84**, 380-391.
- Wang, H., Li, G. and Wang, Y.** (2015). Generating amphioxus *Hedgehog* knockout mutants and phenotypic analysis. *Hereditas* (Beijing) **37**, 1036-1042.
- Wang, Y., Jin, G., Li, Q., Wang, Z., Hu, W., Li, P., Li, S., Wu, H., Kong, X., Gao, J. and Li, Z.** (2016). Hedgehog signaling non-canonically activated by pro-inflammatory cytokines in pancreatic ductal adenocarcinoma. *J.Cancer* **7**, 2067-2076.
- Warner, J.F., Miranda, E.L. and McClay, D.R.** (2016). Contribution of hedgehog signaling to the establishment of left–right asymmetry in the sea urchin. *Dev. Biol.* **411**, 314-324.
- Xavier, G.M., Seppala, M., Barrell, W., Birjandi, A.A., Geoghegan, F. and Cobourne, M.T.** (2016). Hedgehog receptor function during craniofacial development. *Dev. Biol.* **415**, 198-215.
- Yamagishi, C., Yamagishi, H., Maeda, J., Tsuchihashi, T., Ivey, K., Hu, T. and Srivastava, D.** (2006). Sonic hedgehog is essential for first pharyngeal arch development. *Pediatr Res* **59**, 349-354.



- Yamagishi, H., Maeda, J., Hu, T., McAnally, J., Conway, S.J., Kume, T., Meyers, E.N., Yamagishi, C. and Srivastava, D.** (2003). *Tbx1* is regulated by tissue-specific forkhead proteins through a common Sonic hedgehog-responsive enhancer. *Genes Dev.* **17**, 269-281.
- Yu, J.-K., Holland, L.Z. and Holland, N.D.** (2002). An amphioxus nodal gene (*AmphiNodal* ) with early symmetrical expression in the organizer and mesoderm and later asymmetrical expression associated with left–right axis formation. *Evol. Dev.* **4**, 418-425.
- Yu, J.K., Satou, Y., Holland , N.D., Shin-I, T., Kohara, Y., Satoh, N., Bronner-Fraser, M. and Holland, L.Z.** (2007). Axial patterning in cephalochordates and the evolution of the organizer. *Nature* **445**, 613-617.
- Yu, J.K. and Holland, L.Z.** (2009). Amphioxus whole-mount *in situ* hybridization. *Cold Spring Harbor Protocols* **2009**, pdb.prot5286.

## Figures

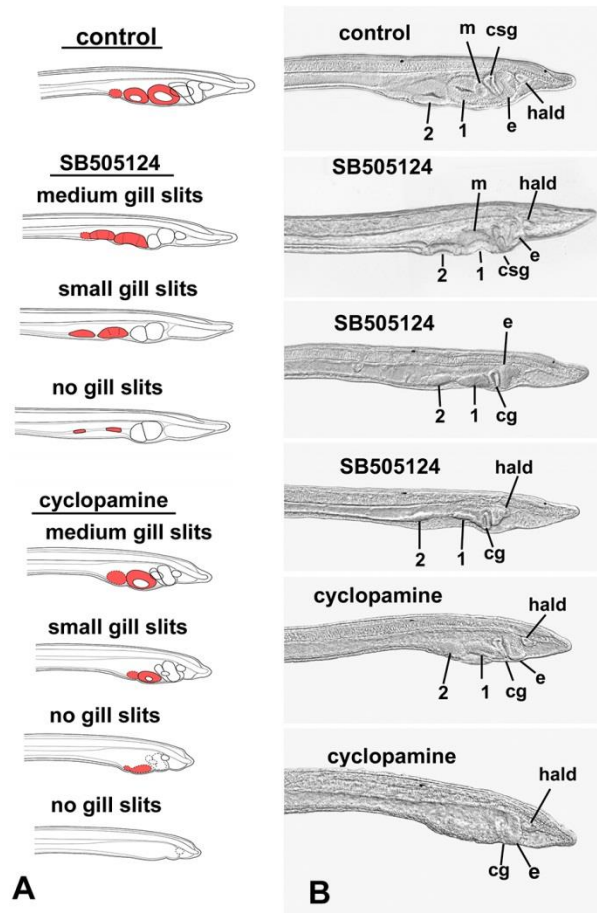

Figure 1. The Nodal inhibitor SB505124 (15  $\mu$ M) or the Hh inhibitor cyclopamine (1.75  $\mu$ M) applied for 20 min at the late gastrula stage of *Branchiostoma floridae* results in a range of pharyngeal phenotypes at the early larval stage. A. Diagrams with the gill slit primordia in orange. Anterior to right. From top to bottom: control with two gill slits (the third gill slit has not yet penetrated); SB505124-treated: medium gill slits ventralized; small gill slits ventralized; no gill slits and very small gill slit primordia; cyclopamine treated: development somewhat retarded; two medium gill slits; one small gill slit; no gill slits with two small gill slit primordia; no gill slits and no gill slit primordia. B. Photographs of living larvae. Anterior to the right. SB505124 treatment shifts gill slit primordia and gill slits to the left. Cyclopamine does not affect the lateral position of the gill slits. First gill slit (1), second gill slit (2), m = mouth, csg = club-shaped gland, e = endodstyle, hald = Hatscheck's anterior left diverticulum, destined to form part of the adenohypophyseal homolog.

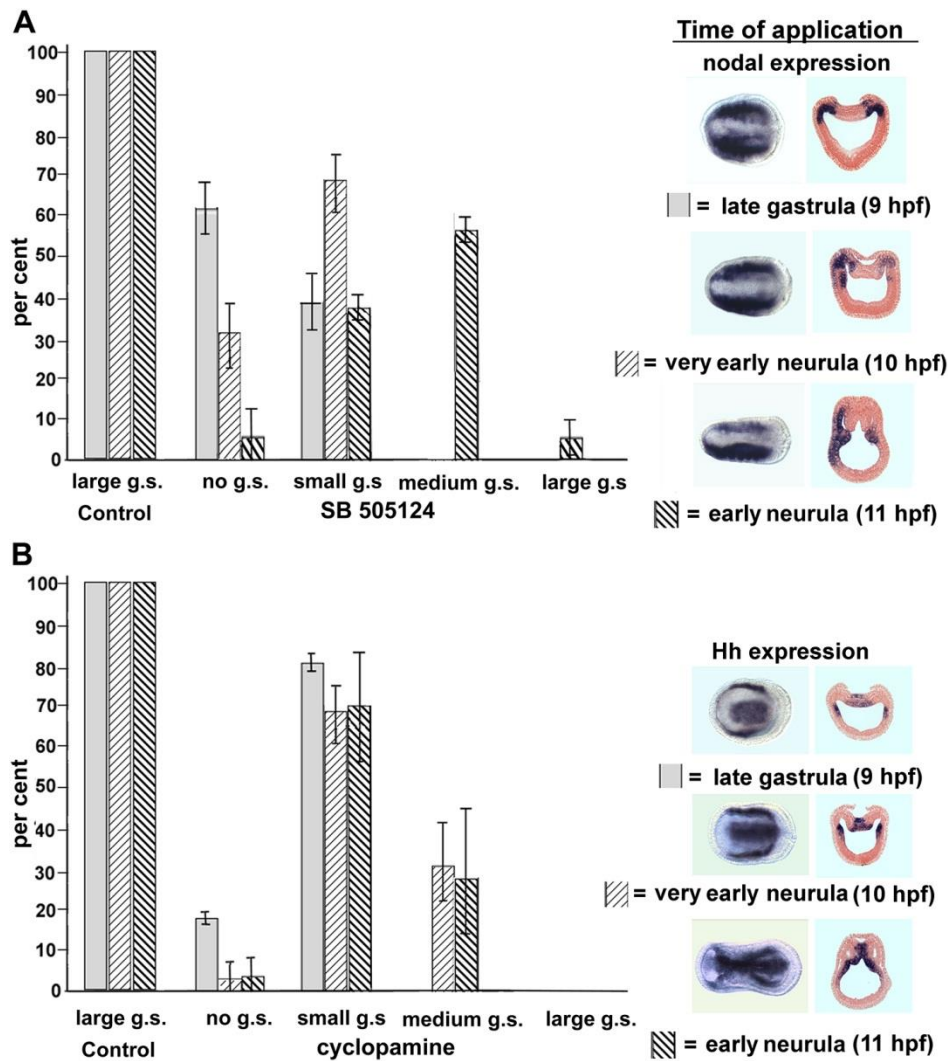

Figure 2. Effects on gill slit formation of (A) 15 $\mu$ M SB505124 or (B) 1.75 $\mu$ M cyclopamine applied to amphioxus (*B. floridae*) embryos for 20 minutes at the late gastrula (9 h), very early neurula (10h) and early neurula (11h). Control larvae were treated with DMSO (for SB505124) or ETOH (for cyclopamine). Gill slit formation was assayed at the early larval stage (43-45 hpf). At this stage, control larvae have formed 2-3 gill slits. For SB505124, sample numbers range from 54 to 154. Average = 87 for controls; 105 for each experiment. For cyclopamine, sample numbers averaged = 100 for controls; 108 for each experiment. Error bars  $\pm$  1 S.D. At right are expression patterns of Nodal and Hedgehog (Hh) in normal larvae at the late gastrula, very early neurula and early neurula. Dorsal views at left, cross-sections at right.

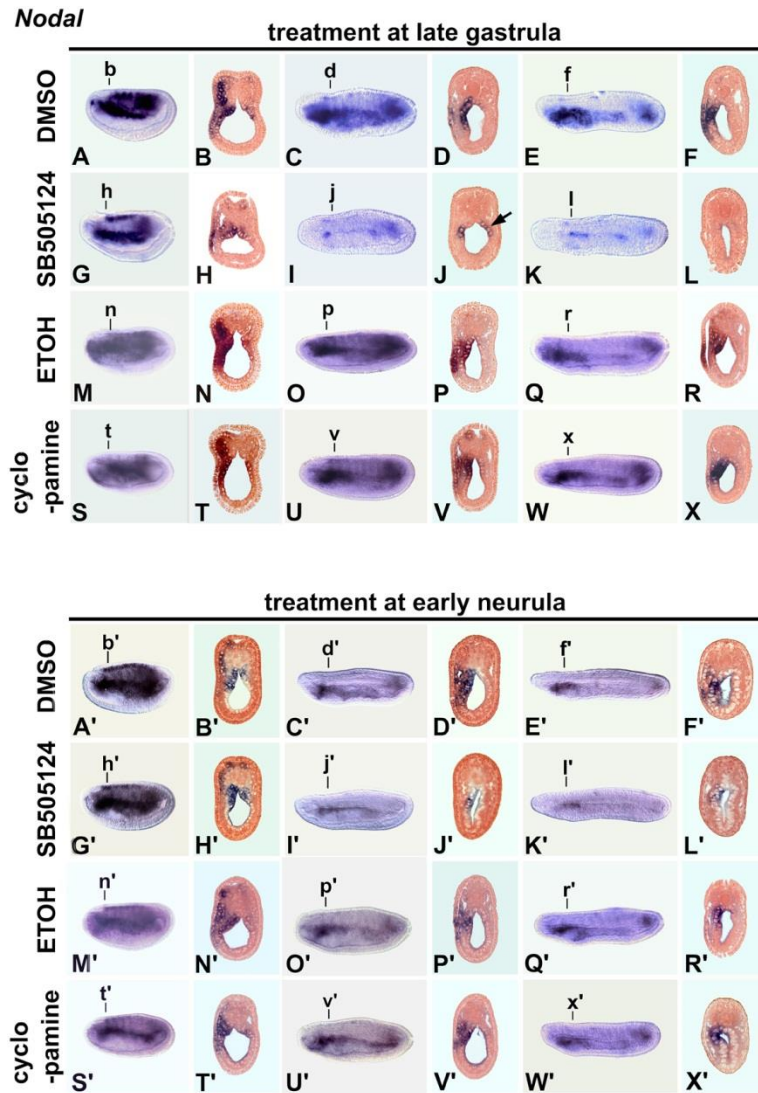

Figure 3. Expression of *Nodal* in control embryos and those treated for 20 min with the Nodal inhibitor SB505124 (15  $\mu$ M) at the late gastrula (A-K) and early neurula (A'-K') or with the Hedgehog inhibitor cyclopamine (1.75  $\mu$ M) at the late gastrula (M-X) and early neurula (M'-X'). Embryos were fixed for in situ hybridization at the early neurula (A,B,G,H,M,N,S,T,A',B',G',H', M',N, S',T'), mid-neurula (C,D,I,J,O,P,U,V,C',D',I',J',O',P',U',V') and late neurula (E,F,K,L,Q,R,W,X,E',F',K',L',Q',R',W',X'). Anterior to left in whole mounts. Cross-sections, viewed from the posterior, are at the levels indicated with the lower case letters in the preceding whole mounts. Arrow in J indicates persistent expression of *Nodal* in SB505124-treated embryos in dorsal/lateral endoderm on the right at the mid-neurula stage.

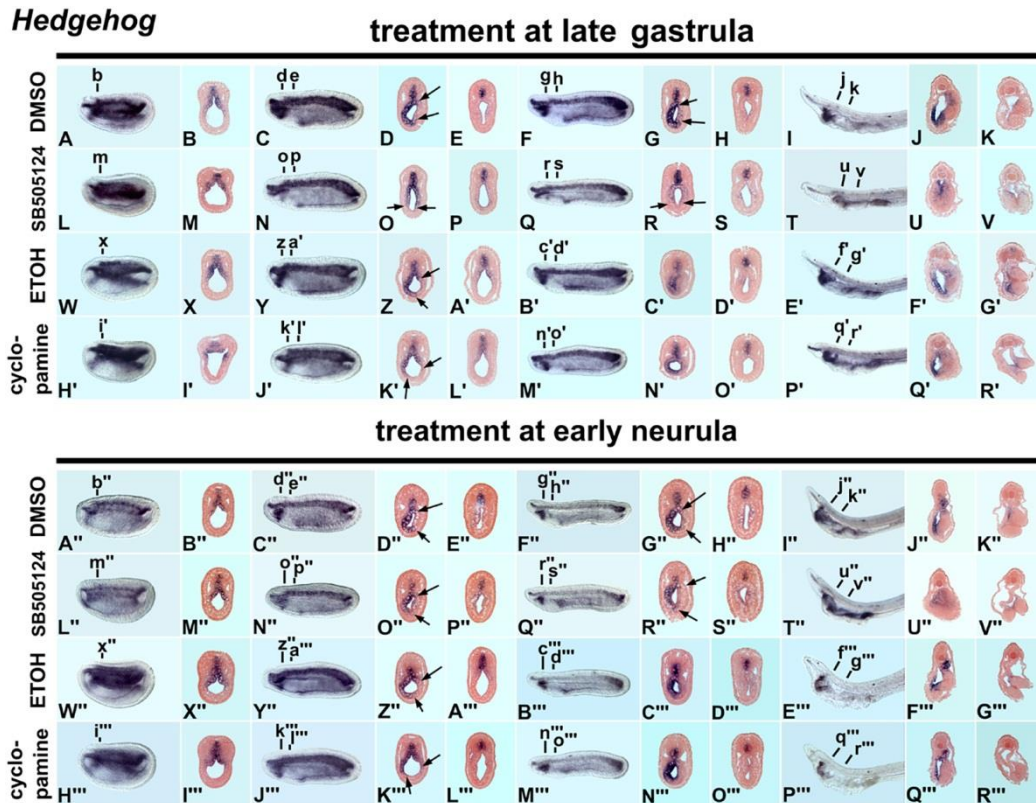

Figure 4. Expression of *Hedgehog* (*Hh*) in control embryos (A-K, W-G', A''-K'', W''-G''') and those treated for 20 min with the Nodal inhibitor SB505124 (15  $\mu$ M) at the late gastrula (L-V) and early neurula (L''-V'') or with the Hh inhibitor cyclopamine (1.75  $\mu$ M) at the late gastrula (H'-R') and early neurula (H'''-R'''). Embryos were fixed for in situ hybridization at the early neurula (A,B,L,M,W,X,H'I'), mid-neurula (C-E, N-P, Y-A', J'-L', C''-E'', N''-P'', Y'-A''', J'''-L'''), late neurula (F-H,Q-S,B'-D', M'-O', F''-H'', Q''-S'', B'''-D''',M'''-O''') and early larva (I-K, T-V, E'-G', P'-R', I''-K'', T''-V'', E'''-G''', P'''-R'''). Anterior to left in whole mounts. Cross-sections, viewed from the posterior, are at the levels indicated with the lower case letters in the preceding whole mounts. Arrows in D,G,O,R, Z,K' and D'',G'',O'',R'', Z'', K''') indicate the limits of the endodermal expression domain.



**Gli**

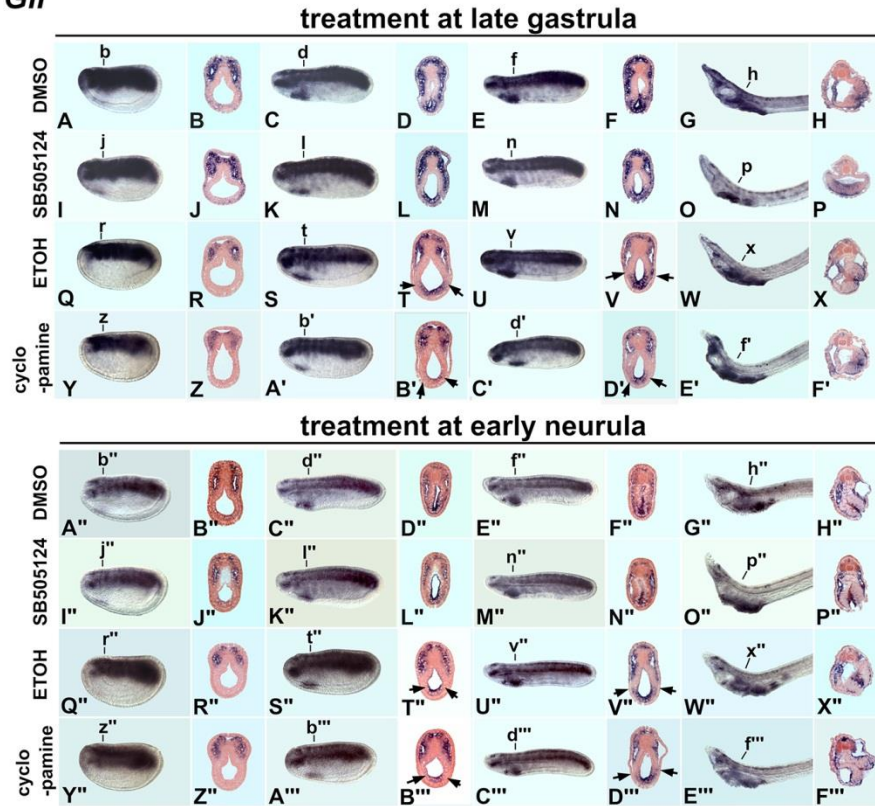

Figure 5. Expression of *Gli* in control embryos (A-H, Q-X, A''-H'', Q''-X'') and those treated for 20 min with the Nodal inhibitor SB505124 (15  $\mu$ M) at the late gastrula (I-P) and early neurula (I''-P'') or with the Hh inhibitor cyclopamine (1.75  $\mu$ M) at the late gastrula (Y-F') and early neurula (Y''-F''). Embryos were fixed for in situ hybridization at the early neurula (A,B,I,J,Q,R,Y,Z, A'',B'',I'',J'',Q'',R'',Y'',Z''), mid-neurula (C,D,K,L,S,T,A',B',C'',D'',K'',L'',S'',T'',A''',B'''), late neurula (E,F,M,N,U,V,C',D',E'',F'',M'',N'',U'',V'',C''',D''') and early larva (G,H,O,P,W,X,E',F',G'',H'',O'',P'',W'',X'',E''',F'''). Anterior to left in whole mounts. Cross-sections viewed from the posterior, are at the levels indicated with the lower case letters in preceding whole mounts. Arrows in indicate the extent of the ventral endodermal domain in controls (T, V, T'', V'') and in embryos treated with cyclopamine at the late gastrula (B',D') and early neurula (B'',D'') stages.

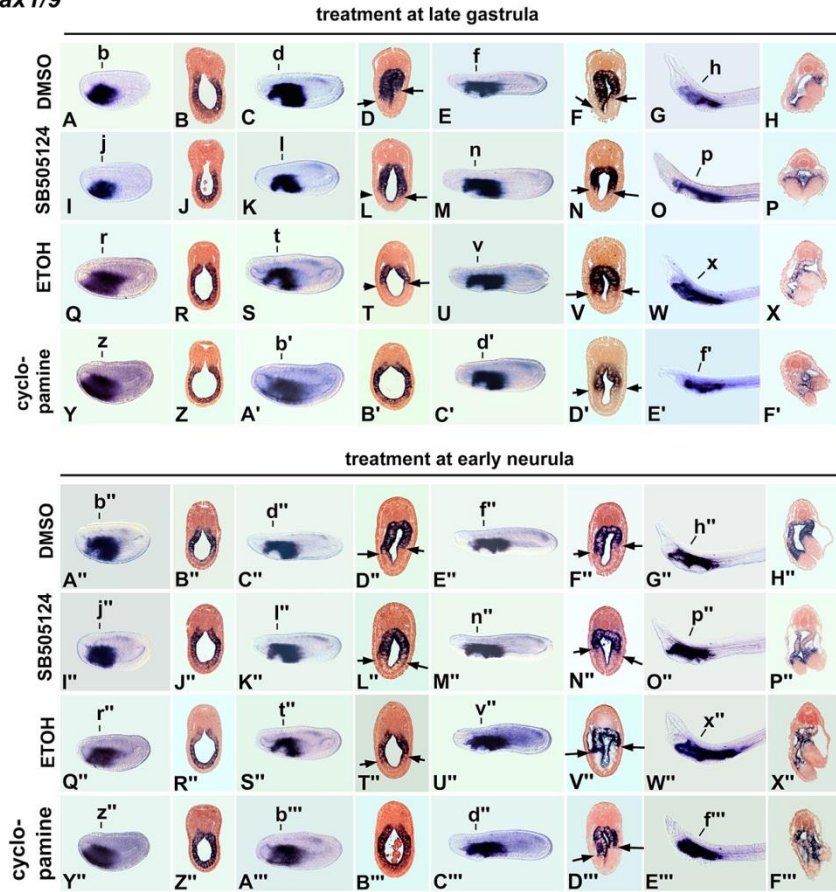

Figure 6. Expression of *Pax1/9* in control embryos (A-H,Q-X, A''-H'', Q''-X'') and those treated for 20 min with the Nodal inhibitor SB505124 (15  $\mu$ M) at the late gastrula (I-P) and early neurula (I''-P'') or with the Hh inhibitor cyclopamine (1.75  $\mu$ M) at the late gastrula (Y-F') and early neurula (Y''-F''). Embryos were fixed for in situ hybridization at the early neurula (A,B,I,J,Q,R,Y,Z, A'',B'',I'',J'',Q'',R'',Y'',Z''), mid-neurula (C,D,K,L,S,T,A',B',C'',D'',K'',L'',S'',T'',A''',B'''), late neurula (E,F,M,N,U,V,C',D',E'',F'',M'',N'',U'',V'',C''',D''') and early larva (G,H,O,P,W,X,E'F',G'',H'',O'',P'',W'',X'',E''',F'''). Anterior to left in whole mounts. Positions of cross-sections are indicated by lower case letters in corresponding whole mounts to the left of sections. Arrows in D, F, L, N, T, V, D'D'',F'L', N'', T'', V'', D''') indicate boundaries of *Pax1/9* expression in the pharyngeal endoderm.



*Pax2/5/8*

treatment at late gastrula

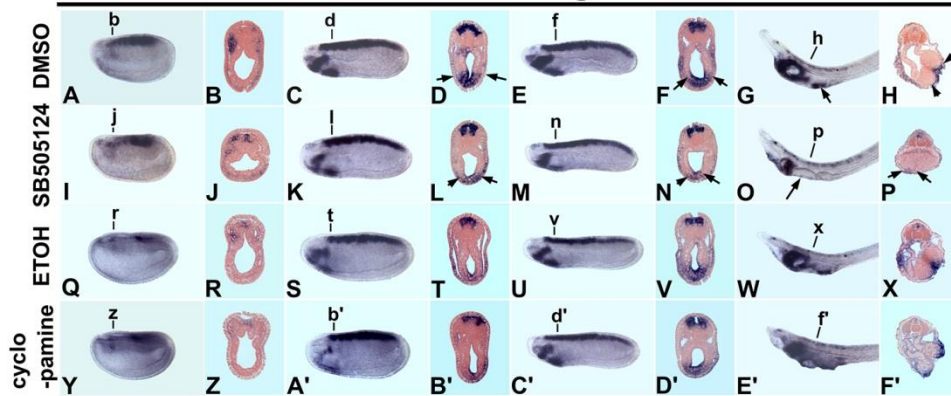

treatment at early neurula

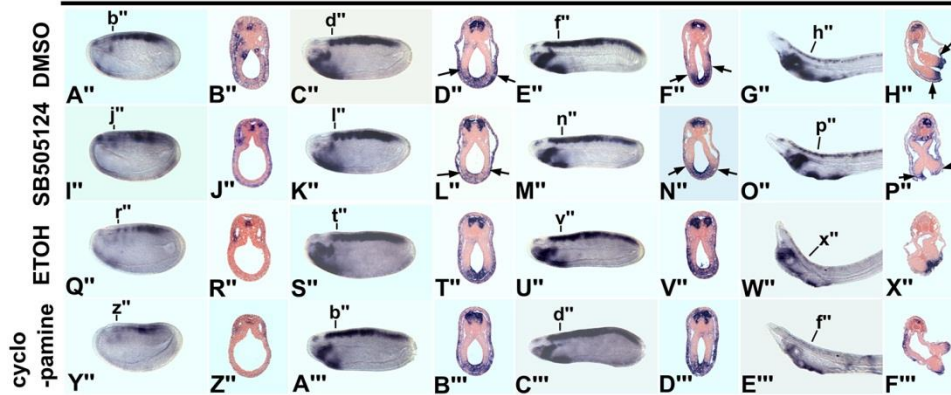

Figure 7. Expression of *Pax2/5/8* in control embryos 9A-H, Q-X, A''-H'', Q''-X'') and those treated for 20 min with the Nodal inhibitor SB505124 (15  $\mu$ M) at the late gastrula (I-P) and early neurula (I''-P'') or with the Hh inhibitor cyclopamine (1.75  $\mu$ M) at the late gastrula (Y-F') and early neurula (Y''-F''). Embryos were fixed for in situ hybridization at the early neurula (A,B,I,J,Q,R,Y,Z, A'',B'',I'',J'',Q'',R'',Y'',Z''), mid-neurula (C,D,K,L,S,T,A',B',C'',D'',K'',L'',S'',T'',A''',B'''), late neurula (E,F,M,N,U,V,C',D',E'',F'',M'',N'',U'',V'',C''',D''') and early larva (G,H,O,P,W,X,E',F',G'',H'',O'',P'',W'',X'',E''',F'''). Arrows in D, F, H, L, N, P, D', F'', H'', L'', N'', P'' indicate the extent of the ventral endodermal domain that marks the future edges of the gill slits and is reduced in SB505124-treated larvae.

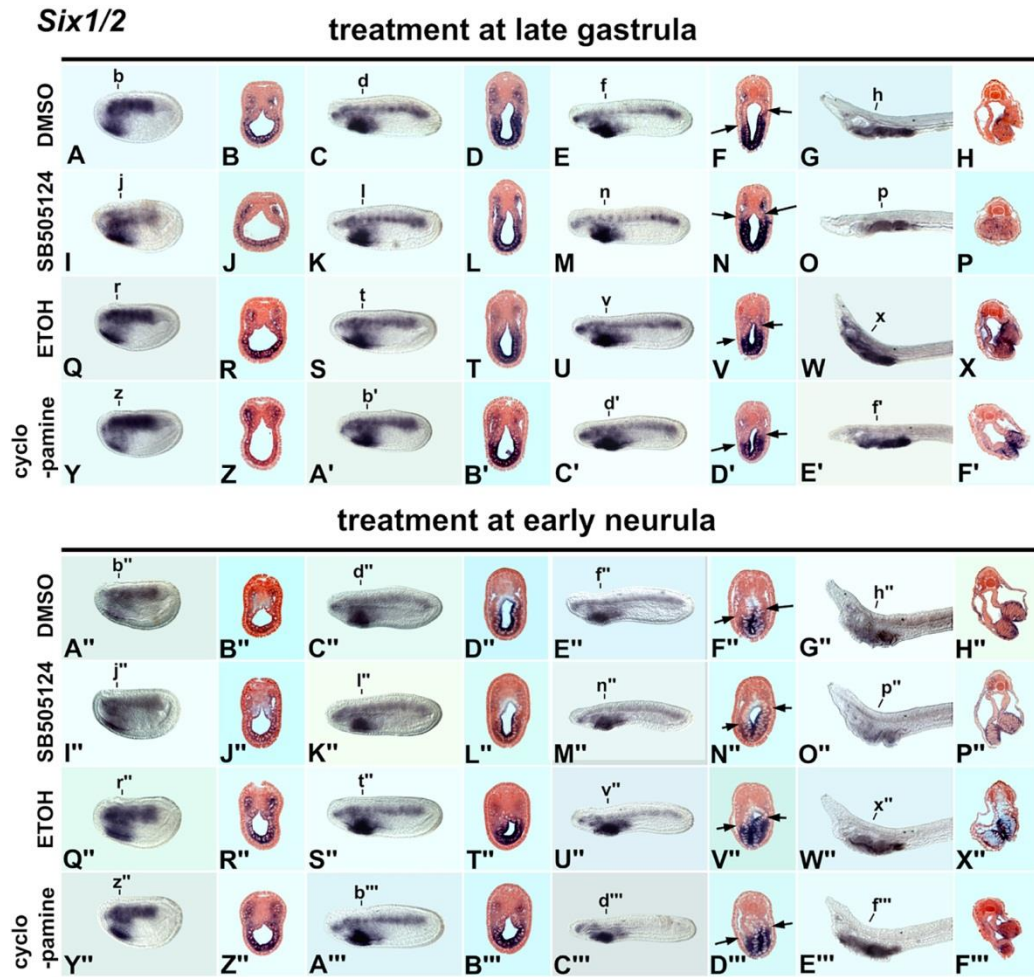

Figure 8. Expression of *Six1/2* in control embryos (A-H, Q-X, A''-H'', Q''-X'') and those treated for 20 min with the Nodal inhibitor SB505124 (15  $\mu$ M) at the late gastrula (I-P) and early neurula (I''-P'') or with the Hh inhibitor cyclopamine (1.75  $\mu$ M) at the late gastrula (Y-F') and early neurula (Y''-F''). Embryos were fixed for in situ hybridization at the early neurula (A,B,I,J,Q,R,Y,Z, A'',B'',I'',J'',Q'',R'',Y'',Z''), mid-neurula (C,D,K,L,S,T,A',B',C'',D'',K'',L'',S'',T'',A''',B'''), late neurula (E,F,M,N,U,V,C',D',E'',F'',M'',N'',U'',V'',C''',D''') and early larva (G,H,O,P,W,X,E'F',G'',H'',O'',P'',W'',X'',E''',F'''). Arrows on cross sections at the late neurula stage F,N,V,D', F'', N'', V'', C''') indicate the borders of the ventral endodermal domain, which is skewed to the right in normal larvae, but shifted to the left in embryos treated at the early gastrula stage with the SB505124.

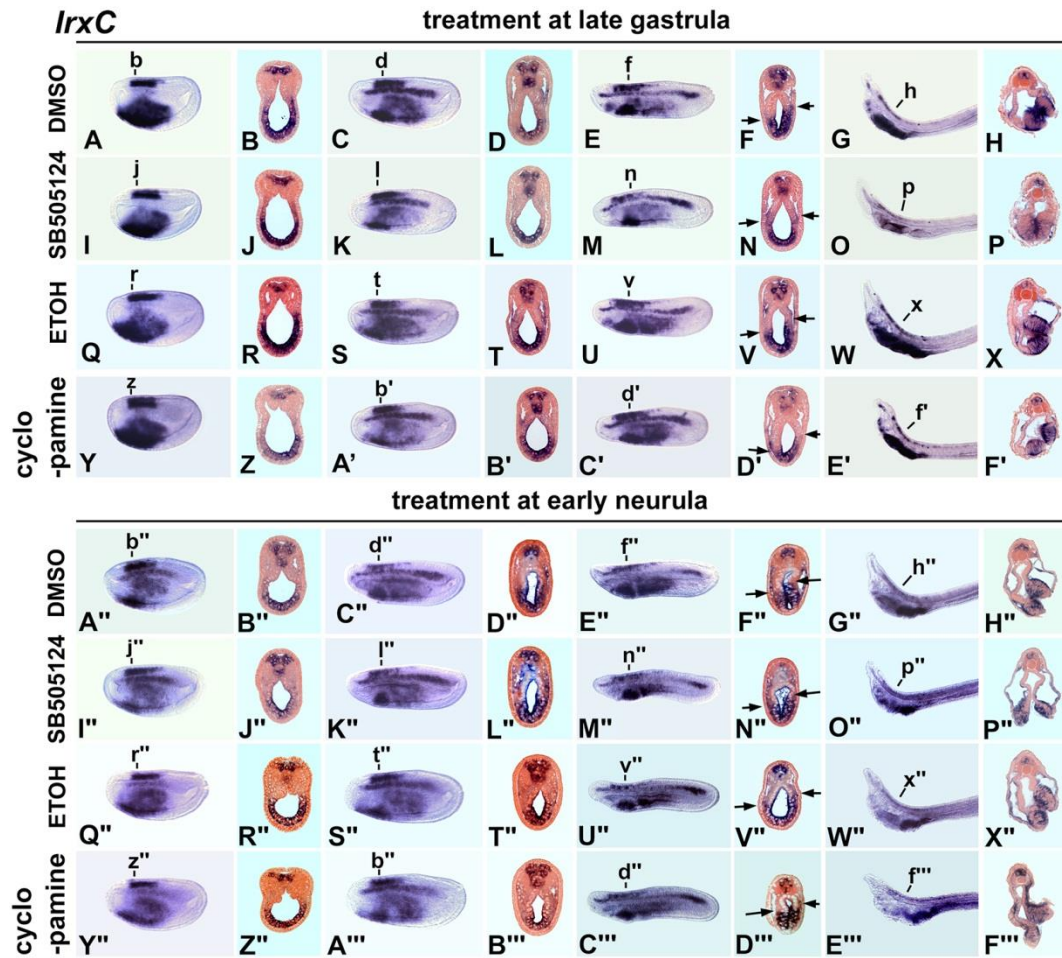

Figure 9. Expression of *IrxC* in control embryos (A-H, Q-X, A''-H'', Q''-X'') and those treated for 20 min with the Nodal inhibitor SB505124 (15  $\mu$ M) at the late gastrula (I-P) and early neurula (I''-P'') or with the Hh inhibitor cyclopamine (1.75  $\mu$ M) at the late gastrula (Y-F') and early neurula (Y''-F''). Embryos were fixed for in situ hybridization at the early neurula (A,B,I,J,Q,R,Y,Z, A'',B'',I'',J'',Q'',R'',Y'',Z''), mid-neurula (C,D,K,L,S,T,A',B',C'',D'',K'',L'',S'',T'',A''',B'''), late neurula (E,F,M,N,U,V,C',D',E'',F'',M'',N'',U'',V'',C''',D''') and early larva (G,H,O,P,W,X,E',F',G'',H'',O'',P'',W'',X'',E''',F'''). Anterior to left in whole mounts. Cross-sections viewed from posterior. Arrows on cross-sections of late neurulae (F,N, V, D', F'', N'', V'', D''') indicate boundaries of endodermal domain of *IrxC*, which is shifted to the left by treatment with SB505124 at the early gastrula stage but not at the early neurula stage or by treatment with cyclopamine.



***Tbx1/10***

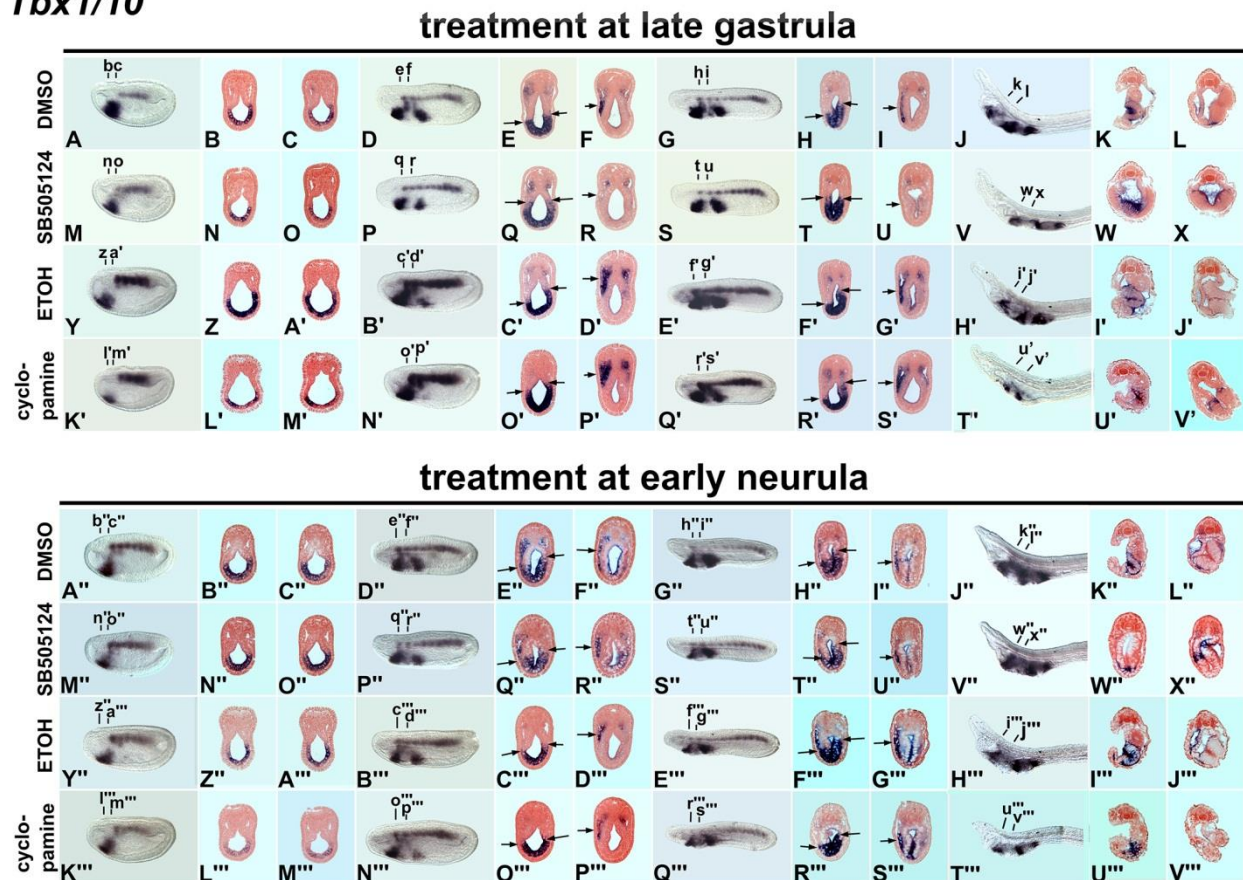

Figure 10. Expression of *Tbx1/10* in control embryos (A-L, Y-J', A''-L'', Y''-J'') and those treated for 20 min with the Nodal inhibitor SB505124 (15  $\mu$ M) at the late gastrula (M-X) and early neurula (M''-X'') or with the Hh inhibitor cyclopamine (1.75  $\mu$ M) at the late gastrula (K'-V') and early neurula (K'''-V'''). Embryos were fixed for in situ hybridization at the early neurula (A-C, M-O, Y-A', K'-M'', A''-C'', M''-O'', Y''-A''', K'''-M'''), mid-neurula (D-F, P-R, B'-D', N'-P', D''-F'', P''-R'', B'''-D''', N'''-P'''), late neurula (G-I, S-U, E'-G', Q'-S', G''-I'', S''-U'', E'''-G''', Q'''-S''') and early larvae (J-L, V-X, H'-J', T'-V', J'-L'', V''-X'', H'''-J''', T'''-V'''). Anterior to left in whole mounts. Cross-sections viewed from posterior.

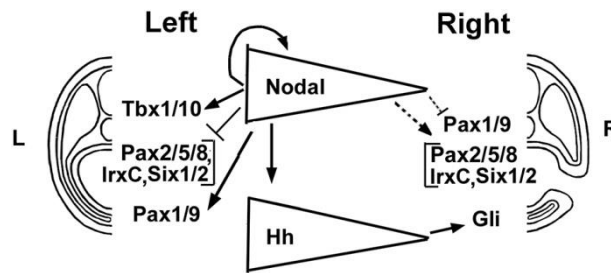

Figure 11. Diagram of gene interactions at the neurula stage in development of the amphioxus gill slits. The interactions shown may be either indirect or direct. Nodal expression is restricted to the left in all three germ layers. Nodal autoregulates. Secreted Nodal protein diffuses towards the right. A high level of Nodal activates Hh expression in endoderm on the left. Very low levels of Nodal protein on the right are required for expression of *Pax2/5/8*, *IrxC*, *Six 1/2* in the gill slit primordia. Expression of these genes is inhibited on the left by high levels of Nodal protein. Hh protein secreted on the left diffuses toward the right. Hh in turn regulates the size of the *Gli* domain in the pharyngeal endoderm. *Tbx1/10* expression in mesoderm on the left requires Nodal signaling. Nodal signaling maintains expression of *Pax1/9* in the pharyngeal endoderm except where gill slits will form.

Suppl. Fig. 1

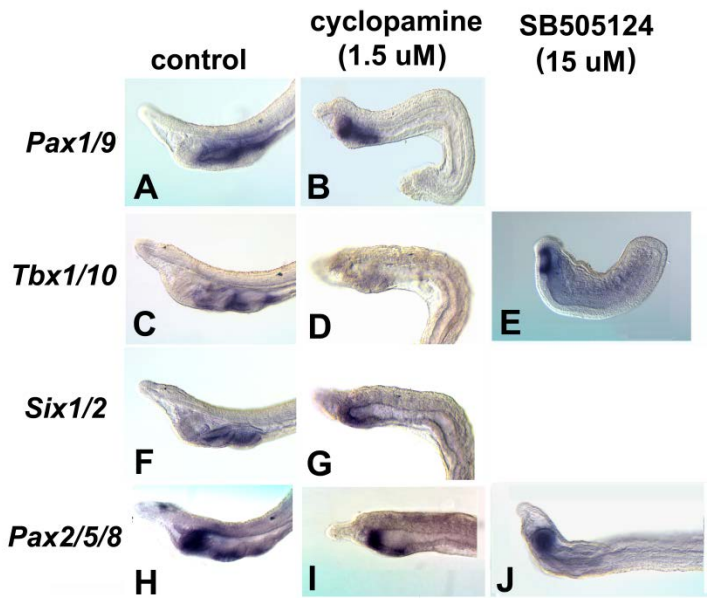

Suppl. Fig. 2

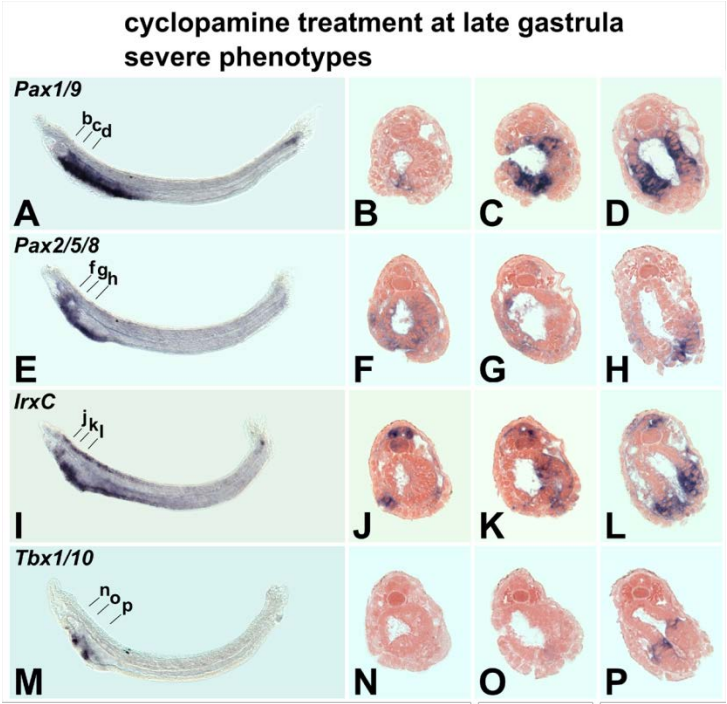

### Suppl. Figure 3.

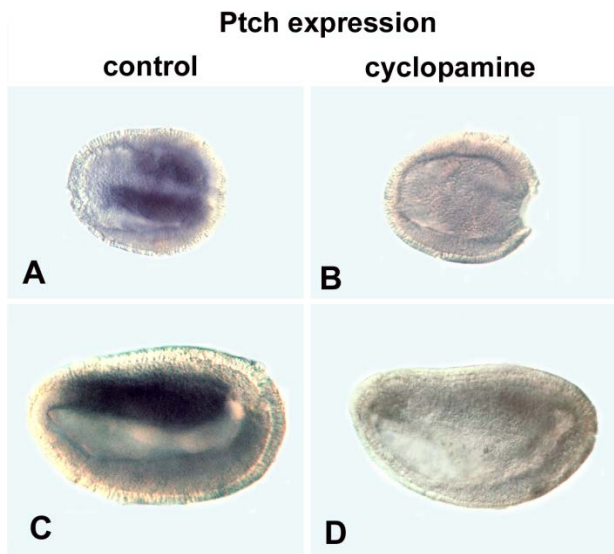

### Supplemental Figure captions

Figure S1. Gene expression in early larvae of *Branchiostoma floridae* in controls and in larvae treated with the Hh inhibitor cyclopamine (B,D,G,I) at 1.5  $\mu$ M and the nodal inhibitor SB505124 (E,J) at 15  $\mu$ M from the early gastrula through the early larva. With both treatments the pharynx is considerably reduced with no gill slits and pharyngeal markers have much smaller, anteriorized domains.

Figure S2. Severe phenotype of larvae treated with 1.75  $\mu$ M cyclopamine for 20 min at the late gastrula stage. The gill slits are impenetrant, but markers of the gill slit primordia are expressed as in control larvae.

Figure S3. Application of 1.75  $\mu$ M cyclopamine at the early gastrula stage inhibits expression of the Hh target Patched (Ptch). A, B. Late gastrula/very early neurula, dorsal views. C,D. Early neurula, side view. Anterior to the left. Cyclopamine treatment inhibits expression of the Hh signaling pathway target Ptch in muscular somites.



| Time of treatment | Newly hatched gastrula      |        |         |          | Early neurula    |               |        |         | Early mid-neurula |          |          |          |
|-------------------|-----------------------------|--------|---------|----------|------------------|---------------|--------|---------|-------------------|----------|----------|----------|
| concentration     | DMSO                        | 1 μM   | 10 μm   | 50 μM    | DMSO             | 1 μM          | 10 μM  | 50 μM   | DMSO              | 1 μM     | 10 μM    | 50 μM    |
| Large gill slits  | +++++                       | NA     | ----    | All dead | +++++            | ++++          | --     | --      | ++++              | ++<br>++ | --       | --       |
| Medium gill slits | -                           | NA     | +++     | All dead | --               | +             | +++    | --      | --                | +        | ++<br>+  | --       |
| Small gill slits  | -                           | NA     | +       | All dead | --               | --            | +      | ++      | --                | --       | +        | --       |
| No gill slits     | -                           | NA     | +       | All dead | --               | --            | +      | +++     | --                | --       | +        | +++<br>+ |
| Time of treatment | Mid-neurula                 |        |         |          | Mid/late neurula |               |        |         | Late neurula      |          |          |          |
| Large gill slits  | +++++                       | ++++   | ++      | --       | +++++            | ++            | --     | --      | ++++              | ++       | --       | --       |
| Medium gill slits | -                           | ++     | ++      | --       | --               | ++            | ++++   | --      | --                | ++       | ++<br>++ | --       |
| Small gill slits  | -                           | -      | +       | --       | --               | +             | +      | --      | --                | +        | +        | --       |
| No gill slits     | -                           | -      | --      | ++++     | --               | --            | --     | ++++    | --                | --       | --       | +++<br>+ |
| cyclopamine       |                             |        |         |          |                  |               |        |         |                   |          |          |          |
| Time of treatment | Newly-hatched late gastrula |        |         |          |                  | Early neurula |        |         |                   |          |          |          |
| concentration     | ETOH                        | 1.5 μM | 1.75 μM | 2.0 μM   | 4.0 μM           | ETOH          | 1.5 μM | 1.75 μM | 2.0 μM            | 4.0 μM   |          |          |
| Large gill slits  | +++++                       | --     | --      | --       | --               | ++++<br>+     | --     | --      | --                | --       |          |          |
| Medium gill slits | --                          | +++    | ++      | --       | --               | --            | +++    | +       | --                | --       |          |          |
| Small gill slits  | --                          | ++     | --      | +++      | --               | --            | +      | +++     | ++++              | --       |          |          |
| No gill slits     | --                          | --     | +       | ++       | ++++             | --            | --     | +       | +                 | ++++     |          |          |
| Time of treatment | Early mid-neurula           |        |         |          |                  | Mid-neurula   |        |         |                   |          |          |          |
| Large gill slits  | +++++                       | --     | --      | --       | --               | ++++<br>+     | --     | --      | --                | --       |          |          |
| Medium gill slits | --                          | +++    | ++      | --       | --               | --            | ++++   | ++      | --                | --       |          |          |
| Small gill slits  | --                          | ++     | +++     | +++++    | --               | --            | +      | ++      | +++++             | --       |          |          |
| No gill slits     | --                          | ---    | --      | --       | +++++            | --            | --     | +       | --                | +++++    |          |          |

Table S1. Time and concentration dependent effects of the nodal inhibitor SB505124 and the Hh inhibitor cyclopamine on pharyngeal development of *Branchiostoma floridae*.
